# Supplementary material for: PSGL-1 inhibits HIV-1 infection by restricting actin dynamics and sequestering HIV envelope proteins
Source: PubMed Central journal article supplement (PMC7400672; doi:10.1038/s41421-020-0184-9), 2020-08-04
Supplement: 41421_2020_184_MOESM1_ESM.pdf [file 41421_2020_184_MOESM1_ESM.pdf]

1 **Supplementary information**

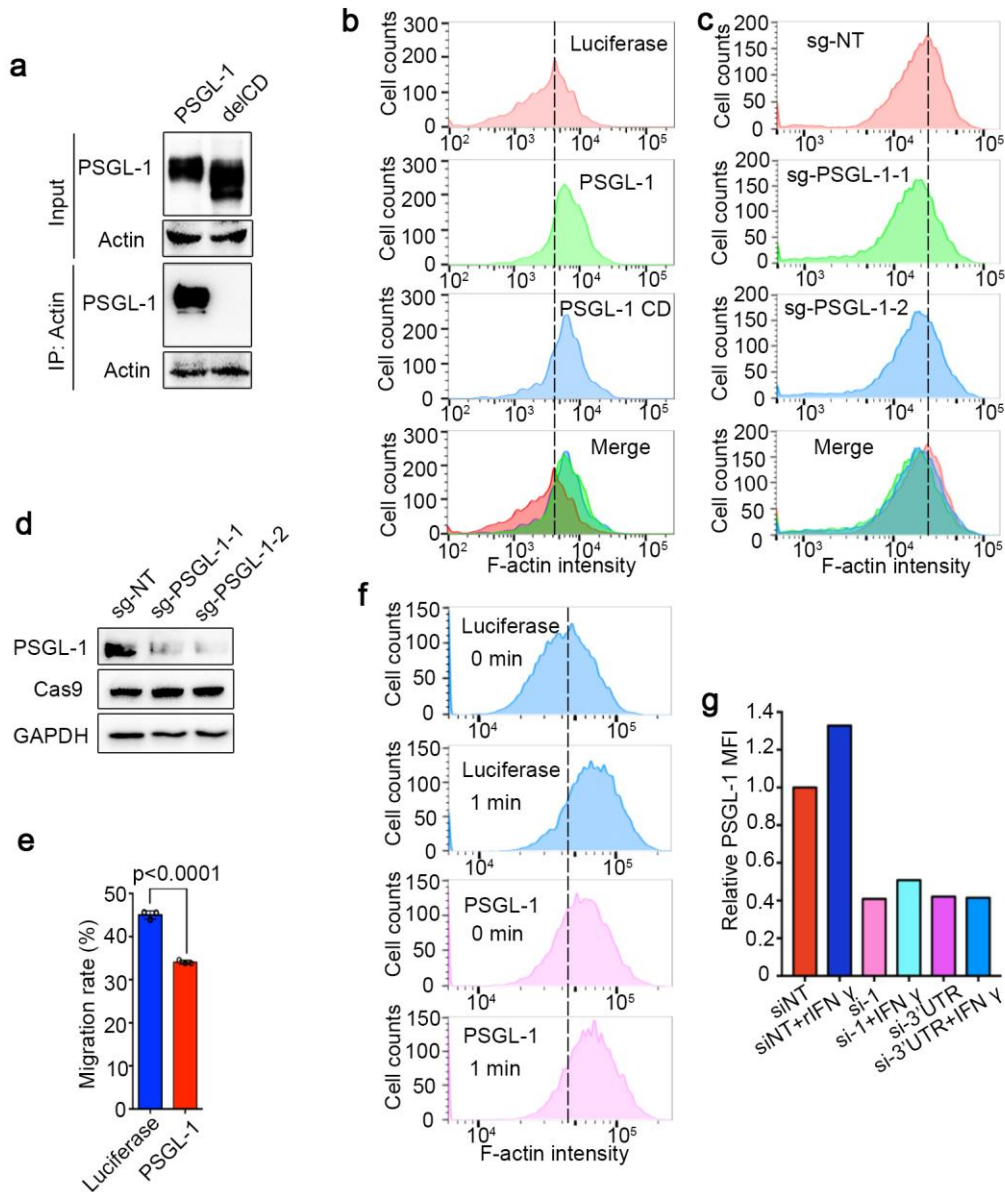

2

3

4 **Supplementary information, Fig. S1 PSGL-1 stabilizes cellular F-actin.** **a** MAGI cells  
 5 transfected with plasmids expressing PSGL-1 or PSGL-1 delCD for 48 h before the cells were  
 6 immunoprecipitated with anti-actin antibody and protein A agarose beads. Samples were then  
 7 analyzed using Western blotting. **b** Jurkat cells overexpressing luciferase, full length PSGL-1 or  
 8 PSGL-1 cytoplasmic domain (CD) were fixed and stained with phalloidin. The intensity of  
 9 phalloidin was quantitated with FACS. **c, d** PSGL-1 knockout Jurkat cells lines were either validated

1 by Western blotting (**d**) or stained with phalloidin for F-actin intensity measurement by FACS (**c**). **e**  
2 Jurkat cells overexpressing luciferase or PSGL-1 were stimulated by SDF-1 for 2 h in a transwell  
3 device. **f** Jurkat cells overexpressing luciferase or PSGL-1 were stimulated with SDF-1 or mock  
4 treated for 1 min and immediately fixed and stained with phalloidin for F-actin intensity  
5 measurement by FACS. Migrated cells were collected and counted by FACS. **g** FACS quantification  
6 of PSGL-1 expression level of IFN- $\gamma$  treated and electroporated primary CD4<sup>+</sup> T cells in **Fig. 1d**  
7 **and 1e**.

8

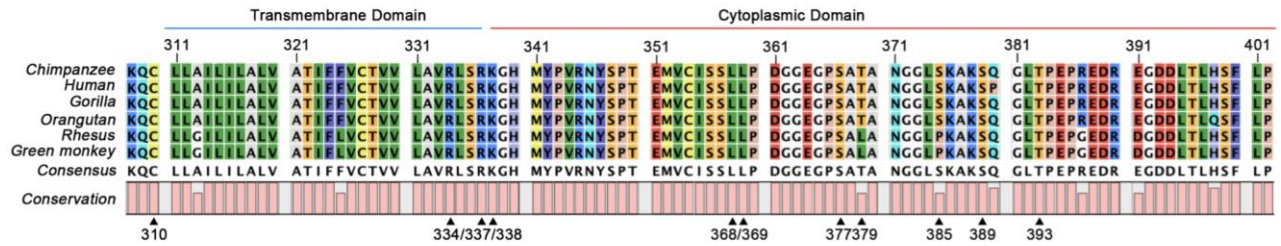

1  
 2 **Supplementary information, Fig. S2 Sequence alignment of PSGL-1.** Sequence alignment of  
 3 the Transmembrane domain and cytoplasmic domain (CD) of PSGL-1 from six primate species.  
 4 Triangles indicate the residues that were mutated to examine the sequence requirement for actin  
 5 binding or gp41 binding or mutations that abolished dimerization of gag colocalization.

6

1

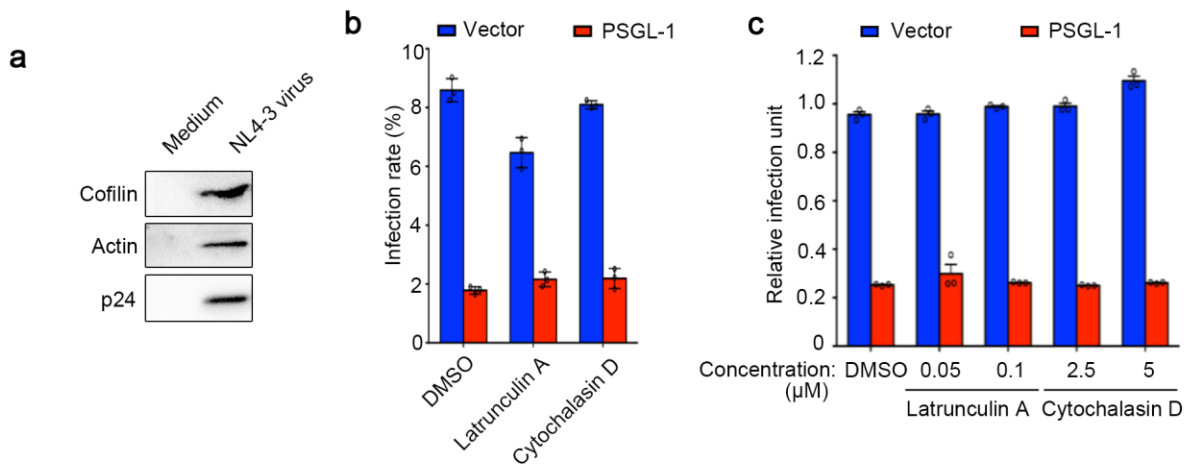

2

3 **Supplementary information, Fig. S3 PSGL-1 stabilizes F-actin in HIV virions.** **a** Western  
4 blotting analysis shows nascent HIV-1 virions contain abundant cofilin and actin. **b** Vpr-BlaM  
5 containing NL4-3 viruses generated from 283T cells with or without PSGL-1 overexpression were  
6 normalized with p24 ELISA. The viruses were used to infect cells treated with latrunculin A or  
7 cytochalasin D or DMSO control. The concentrations of the compounds are equal to the higher  
8 concentration of each drug in **Fig.3d**. Two hours after infection, the cells were incubated with  $\beta$ -  
9 lactamase substrate overnight before being fixed and analyzed by FACs. **c** TZM-bl cells were treated  
10 with actin inhibitors latrunculin A or cytochalasin D or DMSO control at the concentration that is  
11 equal to the final concentration of each drug in the cell medium as in **Fig.3e**. NL4-3 viruses generated  
12 from 283T cells with or without PSGL-1 overexpression were normalized with p24 ELISA and used  
13 to infect the TZM-bl cells pretreated with the indicated compounds. Two days after infection, the  
14 infection rate was quantitated using luciferase assay.

15

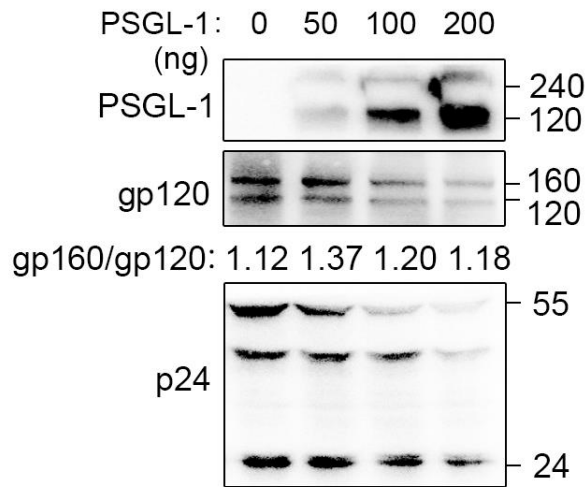

1  
2 **Supplementary information, Fig. S4 PSGL-1 does not affect Env or Gag processing.** 293T  
3 cells were transfected with 1  $\mu$ g pNL4-3 and different amounts of pCMV-PSGL-1 for 48 h  
4 before being lysed for Western blotting analysis. Empty vector was used to normalize the total  
5 DNA transfect.

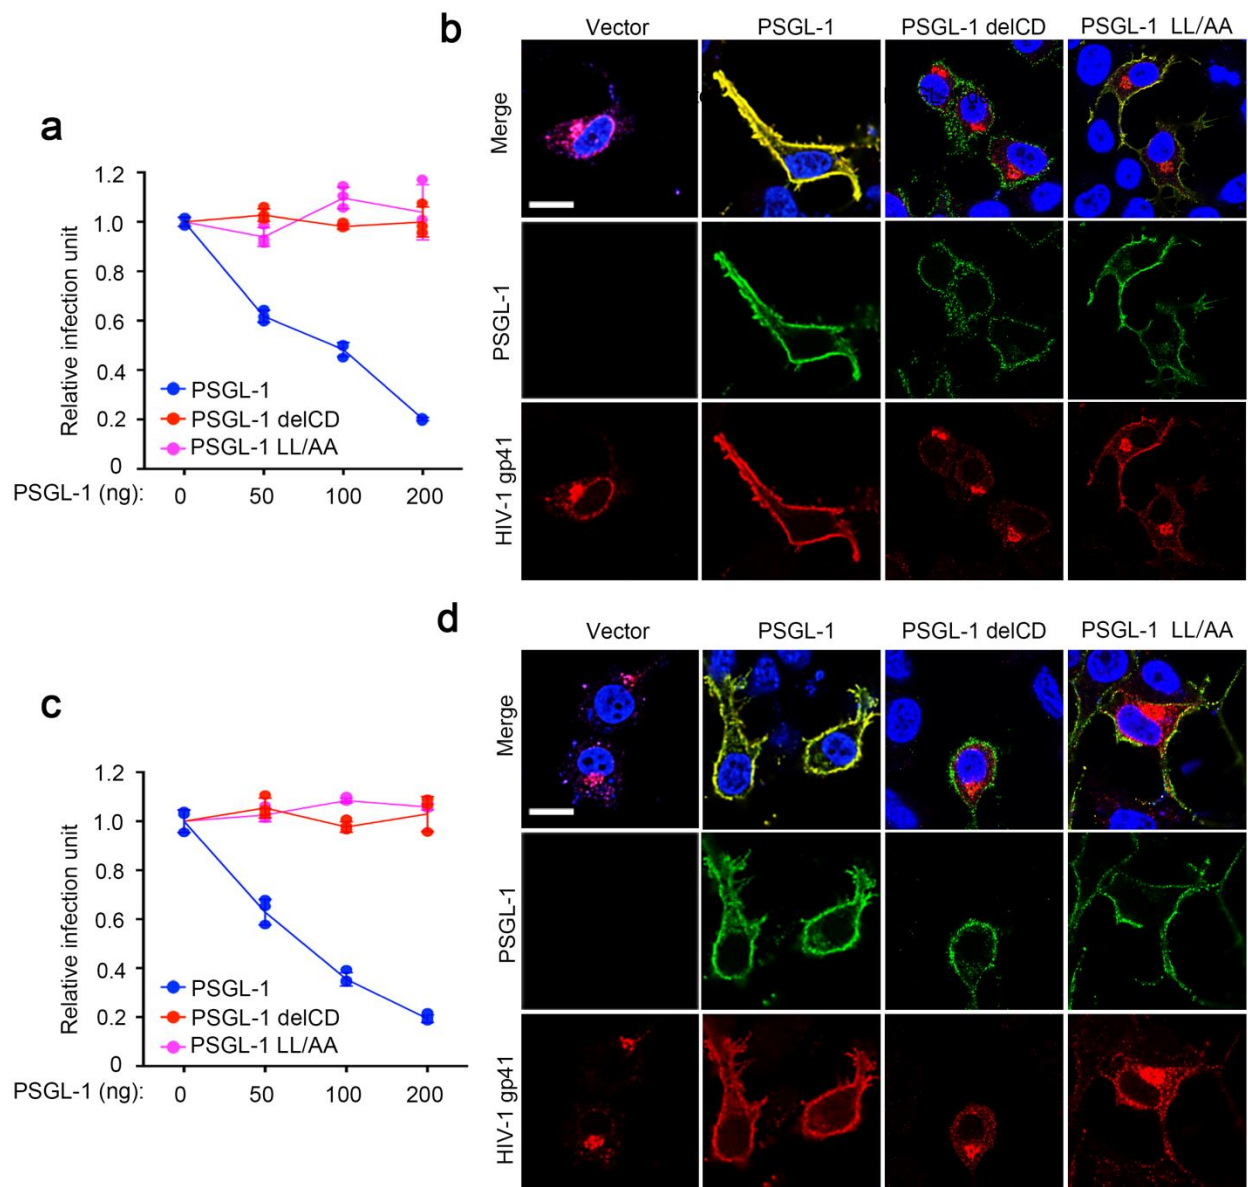

1  
2 **Supplementary information, Fig. S5 PSGL-1 inhibits R5-tropic virions infectivity and**  
3 **interacts with R5-tropic gp41.** TZM-bl cells were infected with virions harvested from 293T  
4 cells transfected with two different R5-tropic HIV plasmids pYU2 (a) or pNL(AD8) (c) and  
5 different amounts of plasmids expressing PSGL-1. Empty vector was used to normalize the total  
6 transfected DNA. The virions were normalized by p24 ELISA. The infection rates were  
7 quantitated with luciferase assays. N=3. 293T cells transfected with pYU2 (b) or pNL(AD8) (d)  
8 and PSGL-1 or an empty vector were fixed and stained with anti-gp41 (red), anti-PSGL-1  
9 (green) antibodies and DAPI (blue). Scale bar: 5µm.

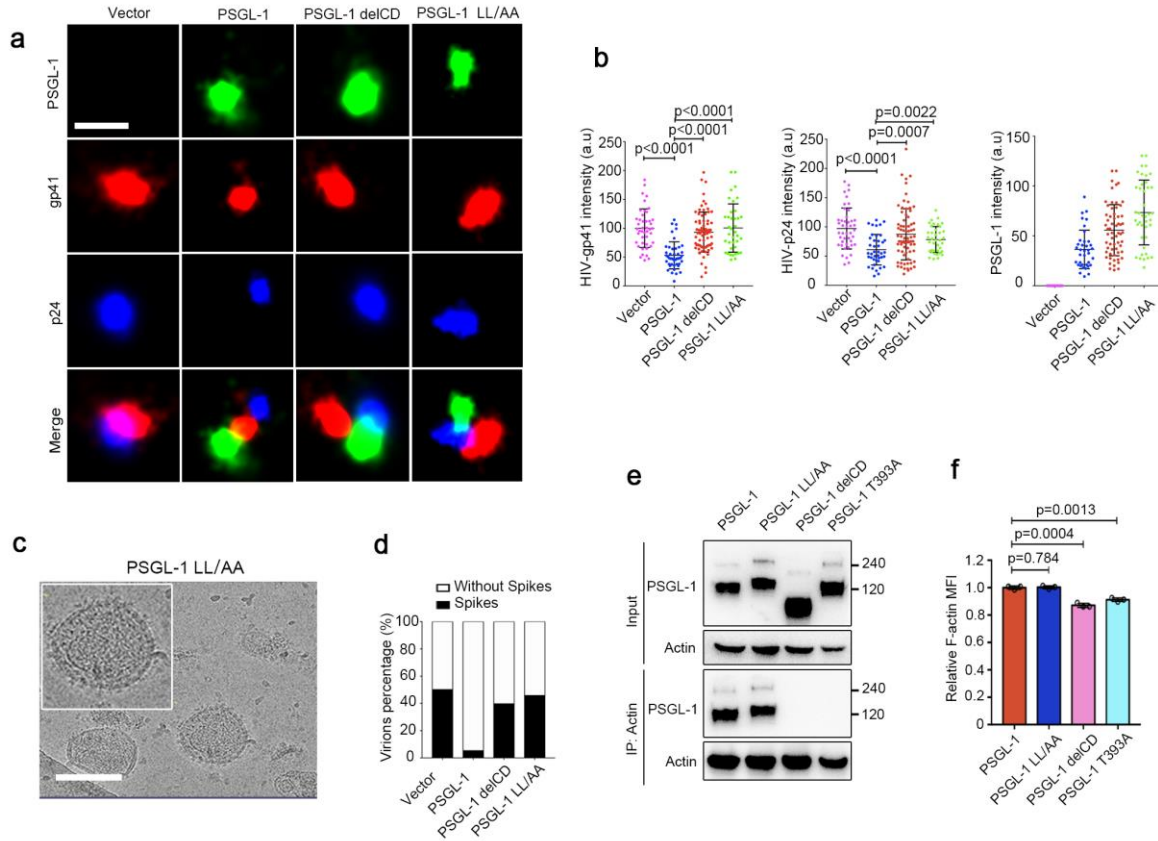

1  
2 **Supplementary information, Fig. S6 PSGL-1 LL/AA is deficient in gp41 interaction, but not**  
3 **in actin-binding.** **a, b** Virions from producer 293T cells transfected with PSGL-1, PSGL-1 delCD  
4 or PSGL-1 LL/AA or an empty vector were pelleted through 20% sucrose cushion were fixed and  
5 stained for STORM imaging. Representative images are shown in **a** and the quantifications of images  
6 are shown in **b**. The quantifications were analyzed together with the data in **Fig. 4g** for comparison.  
7 **c, d** Concentrated virions harvested from 293T cells transfected with pNL4-3 and PSGL-1 LL/AA  
8 were analyzed by cryo-EM analysis. Scale bar: 100nm. Representative images were shown in **c** and  
9 quantification of images of virions shown in **d**. Scale bar: 100 nm. The quantifications were analyzed  
10 together with the data in **Fig. 4i** for comparison. **e** 293T cells were transfected with plasmids  
11 expressing PSGL-1, PSGL-1 delCD, PSGL-1 LL/AA and PSGL-1 T393A. Two days after the  
12 transfection, PSGL-1 were immunoprecipitated with protein A agarose beads with anti-Actin  
13 antibody. The cell lysates and the precipitated proteins were analyzed by Western blotting. **f** Jurkat  
14 cells transfected with different PSGL-1 constructs for 48 h then for phalloidin staining and F-actin  
15 quantification by FACS.  $n = 3$ .

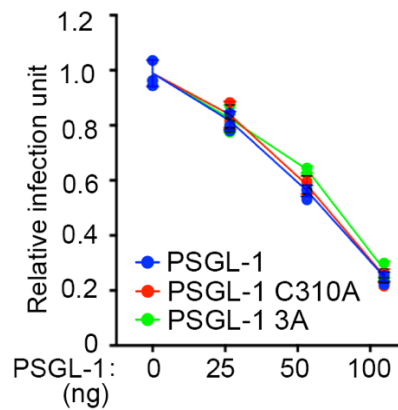

1  
2 **Supplementary information, Fig. S7 PSGL-1's dimerization-deficient mutation and gap co-**  
3 **clustering-deficient mutations have no effect on its anti-viral activity.** a TZM-bl cells were  
4 infected with virions harvested from 293T cells transfected with pNL4-3 plasmids and different  
5 amounts of plasmids expressing PSGL-1 or PSGL-1 C336A mutant (dimerization-deficient),  
6 PSGL-1 3A mutant (gap co-clustering-deficient). The virions were normalized by p24 ELISA  
7 before the infection. The infection rates were quantitated with luciferase assays.  $n = 3$ .

8

9



1 **Supplementary Movie legends:**

2 **Supplementary Movie S1. F-actin+cofilin+GST.avi and Movie S2. F-actin+cofilin+CD- GST.avi:**

3 Purified PSGL-1 cytoplasmic domain in fusion with GST (CD-GST) or GST was mixed with  
4 purified and in vitro polymerized F-actin labeled 5-(and-6)-carboxytetramethylrhodamine-  
5 succinimidylester for 30 min then the mixtures injected into the flow cell coated with 25 nM N-  
6 ethylmaleimidemyosin. Cofilin was injected into the chamber at 10  $\mu$ M final concentration. Single  
7 actin filaments were observed by TIRF illumination with an Olympus IX81 microscope equipped  
8 with a 100x oil objective (1.49 NA). Images were collected for 5min with an interval of 3s. The  
9 movies were generated with a compression rate of 7 frames/second.
